# Supplementary material
Source: publisher figshare collection journal article supplement (https://frontiersin.figshare.com/ndownloader/files/18090365)
Supplement: Supplementary file [file 18090365]

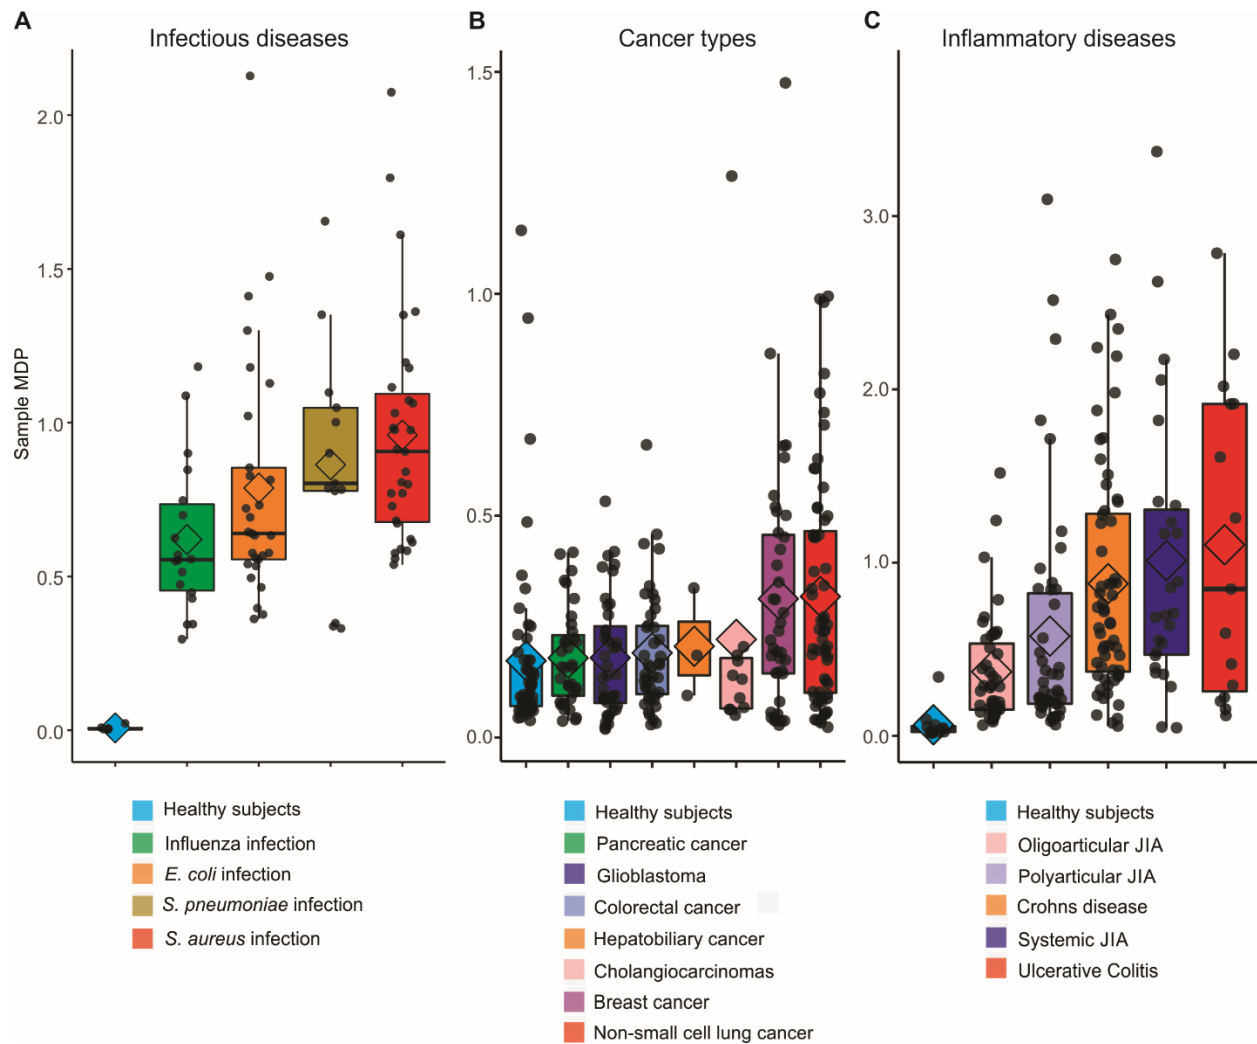

**Figure S1. Sample MDP score of different human diseases.** A) Sample MDP score of patients acutely infected with either virus or bacteria. Data were obtained from blood leukocytes and is available under the GEO accession GSE6269. Healthy subjects (blue) were used as reference group. B) Sample MDP score of different types of cancer. Data were obtained from platelets and is available under the GEO accession GSE68086. Healthy subjects (blue) were used as reference group. C) Sample MDP score of patients with inflammatory diseases. Data were obtained from whole blood and is available under the GEO accession GSE112057. Healthy subjects (blue) were used as reference group.
